# Supplementary material
Source: publisher site journal article supplement (https://www.dovepress.com/article/361270)
Supplement: Supplementary file 1 [file get_supplementary_file.php]

**ORIGINAL RESEARCH**

J Hong et al

**Sleep Staging Using End-to-End Deep Learning Model Based on Nocturnal Sound for Mobile Devices**

Joonki Hong1,2

Hai H. Tran1

Jinhwan Jung1

Hyeryung Jang3

Dongheon Lee1

In-Young Yoon4,6

Jung Kyung Hong4,6*

Jeong-Whun Kim5,6*

1 Asleep Inc., Seoul, Korea

2 Korea Advanced Institute of Science and Technology, Daejeon, Korea

3 Dongguk University, Seoul, Korea

4 Department of Psychiatry, Seoul National University Bundang Hospital, Seongnam, Korea

5 Department of Otorhinolaryngology, Seoul National University Bundang Hospital, Seongnam, Korea

6 Seoul National University College of Medicine, Seoul, Korea

* These authors contributed equally to this work

There are two corresponding authors for this paper and are listed as co-corresponding authors.

Correspondence:

Jeong-Whun Kim, M.D., Ph.D

Department of Otorhinolaryngology, Seoul National University College of Medicine, Seoul National University Bundang Hospital

82, Gumi-ro 173beon-gil, Bundang-gu, Seongnam-si

Gyeonggi-do, 463-707, Korea

E-mail: [kimemails7@gmail.com](mailto:kimemails7@gmail.com)

Jung Kyung Hong, M.D.

Department of Psychiatry, Seoul National University College of Medicine, Seoul National University Bundang Hospital

82, Gumi-ro 173beon-gil, Bundang-gu, Seongnam-si

Gyeonggi-do, 463-707, Korea

E-mail: [hongjk15@gmail.com](mailto:hongjk15@gmail.com)

**Supplementary Figures**

**Figure S1.** Mel spectrograms and corresponding frame energy plots in dB scale for each sleep stage. Some respiratory patterns could not be detected by frame energy analysis because of high ambient noise energy level. Detecting respiratory event using a threshold-based or rule-based algorithm can come up with tremendous false positive and false negative. On the other hand, by looking at frequency patterns in Mel spectrogram, the existence of breathing is clearly recognizable.

**Supplementary Tables**

**Table S1.** Performance comparison between previous sound-based sleep staging works and SoundSleepNet.

| Related works | Measurement | Microphone | Manual annotation | Number of subjects | Cohen’s Kappa | | |
| --- | --- | --- | --- | --- | --- | --- | --- |
| **2-class**  (Wake/Sleep) | **3-class**  (Wake/NREM/REM) | **4-class**  (Wake/Light/ Deep/REM) |
| Ghahjaverestan et al.  (2020)a [10] | Contact | The Patch | X | 88 | 0.54 | NA | NA |
| Kalkrenner et al.  (2019) a [12] | Contact | LEOSound | X | 53 | 0.69 | 0.42 | 0.36 |
| Nakano et al.  (2019) a [11] | Contact | RP-VC3, Panasonic; | X | 1,852 | 0.63 | 0.55 | 0.53 |
| Xue et al.  (2019) a [18] | Non-contact  (0.25 m) | NA | X | 13 | 0.49 | 0.42 | 0.43 |
| Dafna et al.  (2018) a [9] | Non-contact  (1 m) | NTG1, RODE  (directional, 76 dB) | O | 250 | 0.68 | 0.69 | NA |
| SoundSleepNetb |  |  |  |  |  |  |  |
| (a) PSG to PSG-V | Non-contact  (1.7 m) | SUPR-102, YIANDA (MEMS, 60dB) | X | 1,154 | 0.71 | 0.66 | 0.57 |
| (b) PSG to PSG-T | Non-contact  (1.7 m) | SUPR-102, YIANDA (MEMS, 60dB) | X | 1,154 | 0.68 | 0.62 | 0.53 |
| (c) Mixed to Smp–V | Non-contact  (1 m) | LG G3 | X | 327 | 0.68 | 0.68 | 0.58 |
| (d) Mixed to Smp-T | Non-contact  (1 m) | LG G3 | X | 327 | 0.65 | 0.61 | 0.52 |

**Notes:**aPrevious works have reported performance in validation.

bPerformance of SoundSleepNet was presented for PSG audio (a and b) and smartphone audio (c and d) datasets. Performance in both validation (a, c) and test set (b, d) was presented.

**Abbreviations:** PSG, polysomnography audio dataset; Mixed, mixed audio dataset; Smp, smartphone audio dataset; V, validation set; T, test set; NA, not available.

**Table S2.** Performance comparison between several consumer sleep trackers [29] and SoundSleepNet.

| Company | Device | n | Sensitivity | | | | Mean  per-class sensitivity |
| --- | --- | --- | --- | --- | --- | --- | --- |
| **Wake** | **Light** | **Deep** | **REM** |
| Fitbit | Alta HR | 49 | 0.55 | 0.76 | 0.53 | 0.69 | 0.63 |
| Garmin | Fenix 5s | 29 | 0.18 | 0.68 | 0.56 | 0.54 | 0.48 |
| Garmin | Vivosmart 3 | 43 | 0.19 | 0.70 | 0.56 | 0.50 | 0.50 |
| EarlySense | Live | 51 | 0.47 | 0.57 | 0.68 | 0.64 | 0.59 |
| ResMed | S+ | 51 | 0.52 | 0.67 | 0.59 | 0.50 | 0.57 |
| SleepScore | Max | 42 | 0.50 | 0.68 | 0.59 | 0.49 | 0.57 |
| SoundSleepNet  (PSG to PSG-T) | SUPR-102, YIANDA (MEMS, 60dB) | 1,154 | 0.77 | 0.73 | 0.46 | 0.66 | 0.66 |
| SoundSleepNet  (Mixed to Smp-T) | LG G3 | 327 | 0.72 | 0.73 | 0.46 | 0.70 | 0.65 |

**Notes:**

**Abbreviations:** PSG, polysomnography audio dataset; Mixed, mixed audio dataset; Smp, smartphone audio dataset; T, test set.
